# Supplementary material for: High-performance ultra-low-voltage organic field-effect transistors based on anodized TiOx dielectric and solution-sheared organic single crystals
Source: Royal Society of Chemistry journal article supplement (doi:10.1039/d3tc01205k), 2023-01-01
Supplement: d3tc01205k1.pdf [file d3tc01205k1.pdf]

## Supporting Information

High-Performance Ultra-Low-Voltage Organic Field-effect Transistor Based on  
Anodized TiO<sub>x</sub> Dielectric and Solution-sheared Organic Single Crystal

Bowen Geng<sup>1</sup>, Feng Zhang<sup>1</sup>, Xiaohai Ding<sup>1</sup>, Lei Liu<sup>1</sup>, Yan Chen<sup>1</sup>, Shuming Duan<sup>2\*</sup>, Xiaochen  
Ren<sup>1\*</sup> and Wenping Hu<sup>1\*</sup>

<sup>1</sup> Tianjin Key Laboratory of Molecular Optoelectronic Sciences, Department of Chemistry, School of  
Science, Tianjin University & Collaborative Innovation Center of Chemical Science and Engineering  
(Tianjin), Tianjin, 300072

<sup>2</sup> Joint School of National University of Singapore and Tianjin University, International Campus of  
Tianjin University, Binhai New City, Fuzhou, 350207, China

\* Corresponding author (email: [smduan@tjufz.org.cn](mailto:smduan@tjufz.org.cn), [renxiaochen@tju.edu.cn](mailto:renxiaochen@tju.edu.cn), [huwp@tju.edu.cn](mailto:huwp@tju.edu.cn))

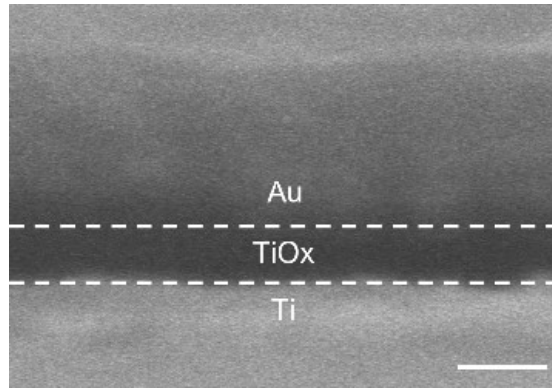

**Figure S1** Cross-sectional scanning electron microscope (SEM) image of Au/TiO<sub>x</sub>/Ti, scale bar is 50 nm.

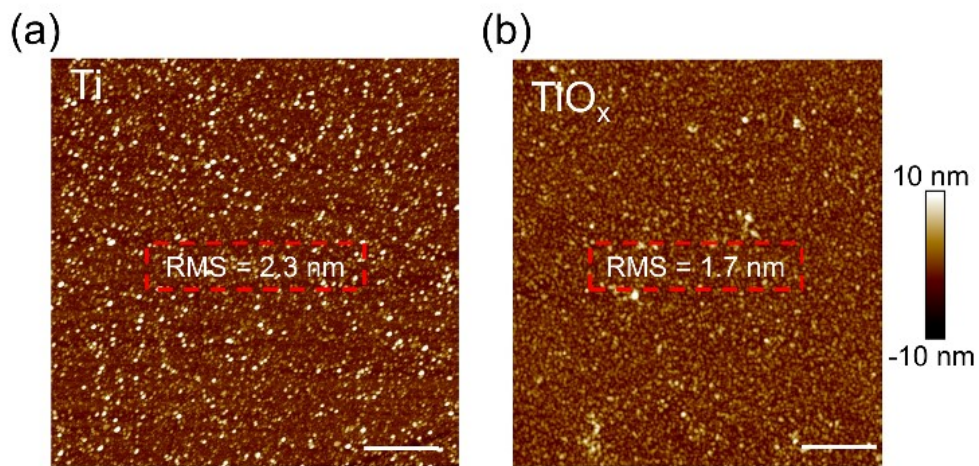

**Figure S2** (a), (b) AFM image of the surface morphology of Ti thin film and TiO<sub>x</sub> thin film, scale bar is 1  $\mu$ m.

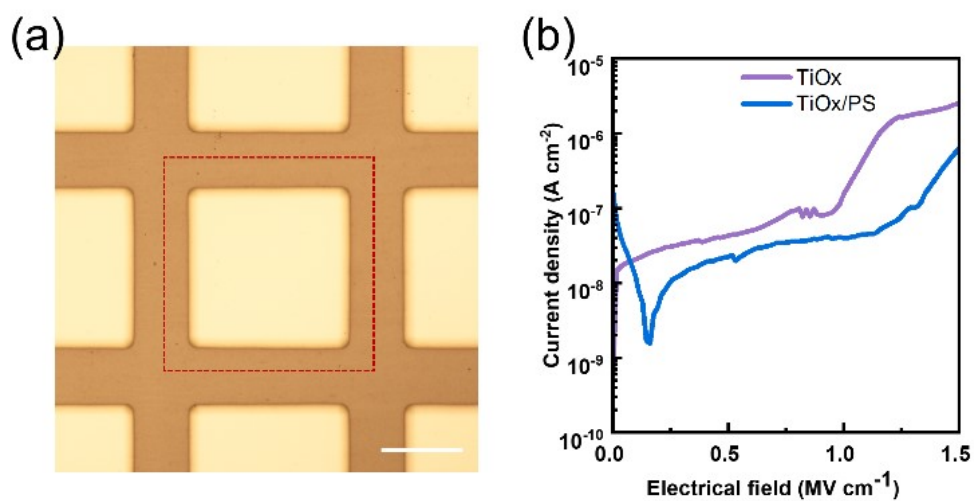

**Figure S3** (a) Optical image of the Ag/TiO<sub>x</sub>/Ti capacitive device, areal area of top Ag electrode is 0.04 mm<sup>2</sup>, scale bar is 100 μm. (b) Leakage current density of pure TiO<sub>x</sub> dielectric and TiO<sub>x</sub>/PS dual dielectrics.

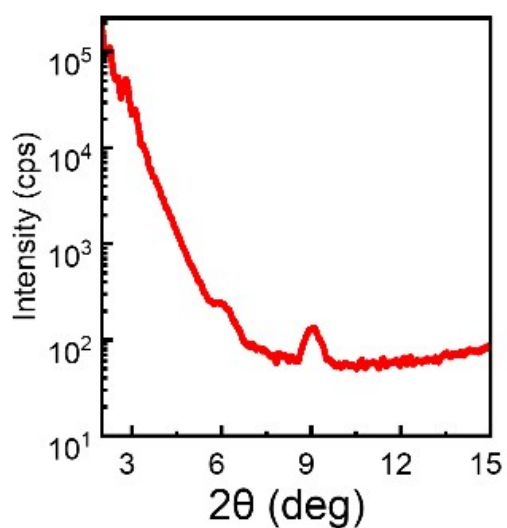

**Figure S4** Out-of-plane X-ray diffraction of C<sub>8</sub>-BTBT crystal on TiO<sub>x</sub>/PS substrate.

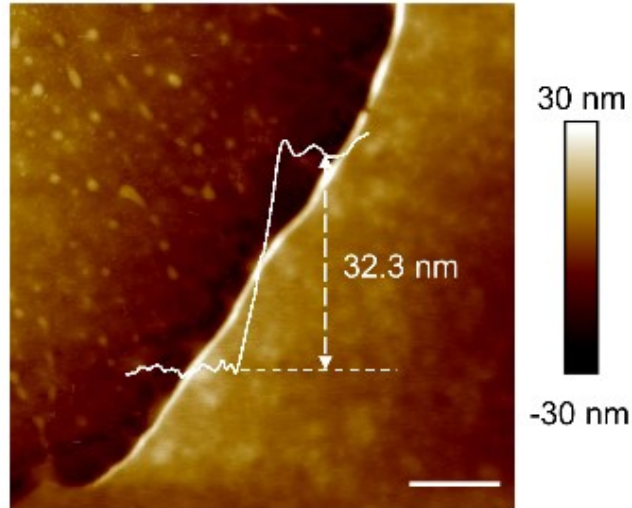

**Figure S5** AFM image of C<sub>8</sub>-BTBT crystal with the thickness estimated at 32.3 nm, scale bar is 1  $\mu\text{m}$ .

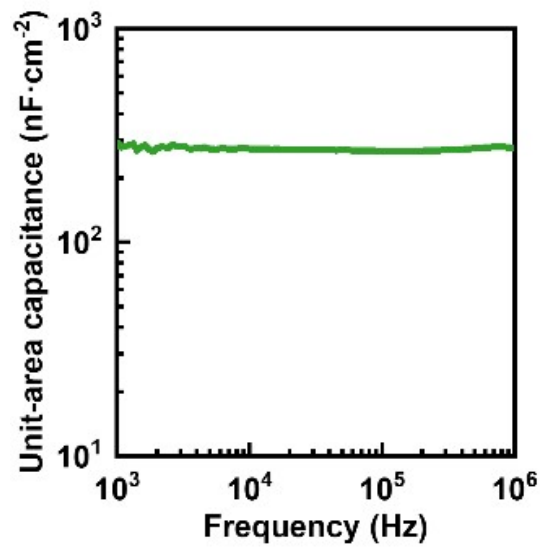

**Figure S6** Unit-area capacitance of AlO<sub>x</sub>/PS dual dielectrics which using the same process of TiO<sub>x</sub>/PS dielectrics.

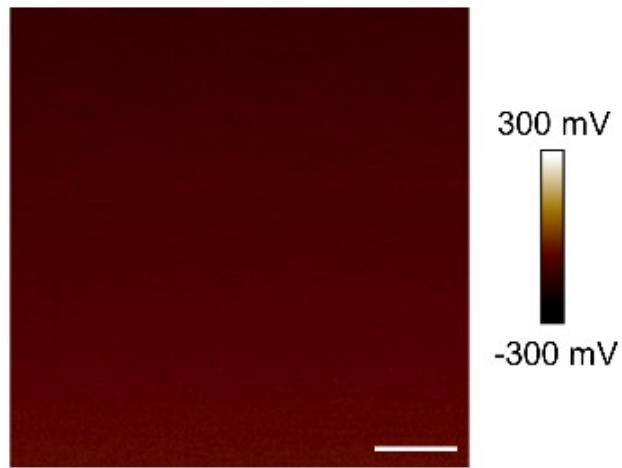

**Figure S7** Surface potential map of evaporated titanium measured by KPFM, scale bar is 1  $\mu\text{m}$ .
